# Supplementary material for: Novel Technique for Retinal Nerve Cell Regeneration with Electrophysiological Functions Using Human Iris-Derived iPS Cells
Source: PubMed Central journal article supplement (PMC8067101; doi:10.3390/cells10040743), 2021-03-28
Supplement: cells-10-00743-s001.pdf [file cells-10-00743-s001.pdf]

Article

# Novel Technique for Retinal Nerve Cell Regeneration with Electrophysiological Functions Using Human Iris-Derived iPS Cells

Naoki Yamamoto <sup>1,2,\*</sup>, Noriko Hiramatsu <sup>3</sup>, Mahito Ohkuma <sup>4</sup>, Natsuko Hatsusaka <sup>1</sup>, Shun Takeda <sup>1</sup>, Noriaki Nagai <sup>5</sup>, Ei-ichi Miyachi <sup>4,6</sup>, Masashi Kondo <sup>7</sup>, Kazuyoshi Imaizumi <sup>7</sup>, Masayuki Horiguchi <sup>8</sup>, Eri Kubo <sup>1</sup> and Hiroshi Sasaki <sup>1</sup>

Supplementary Materials:

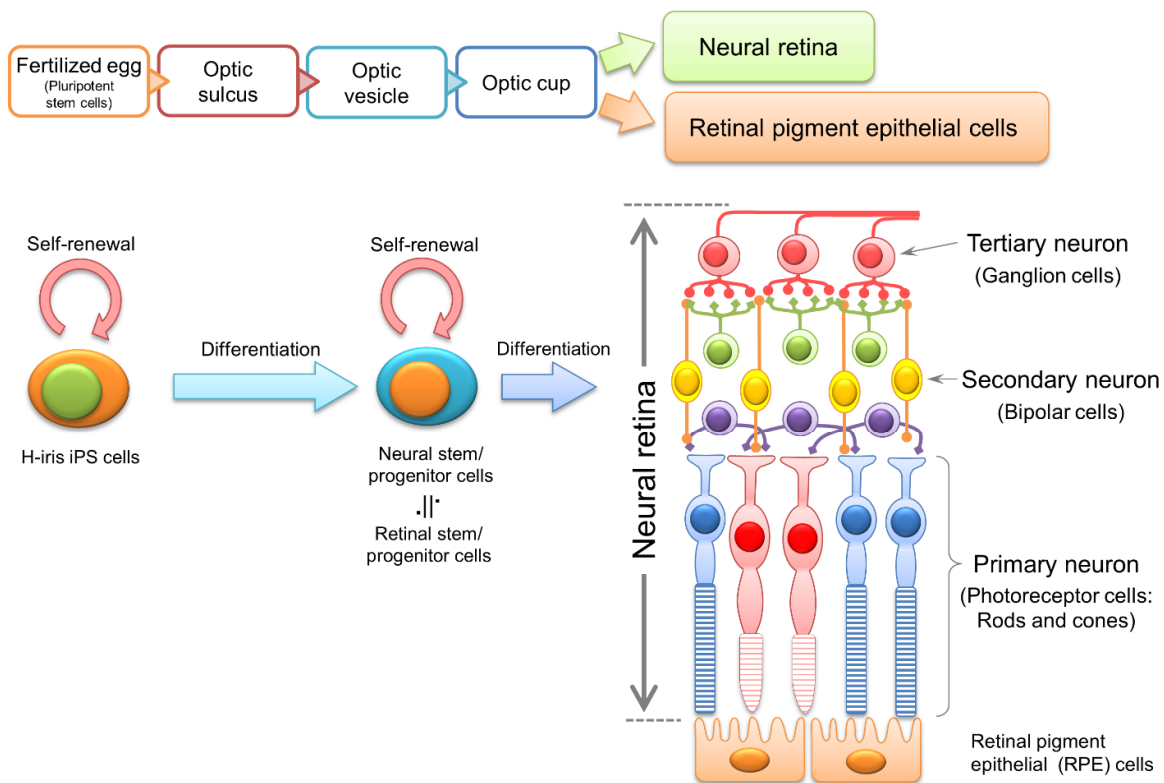

**Figure S1.** Outline of the differentiation of iPS cells into neural stem/progenitor cells, neural retina, and RPE.

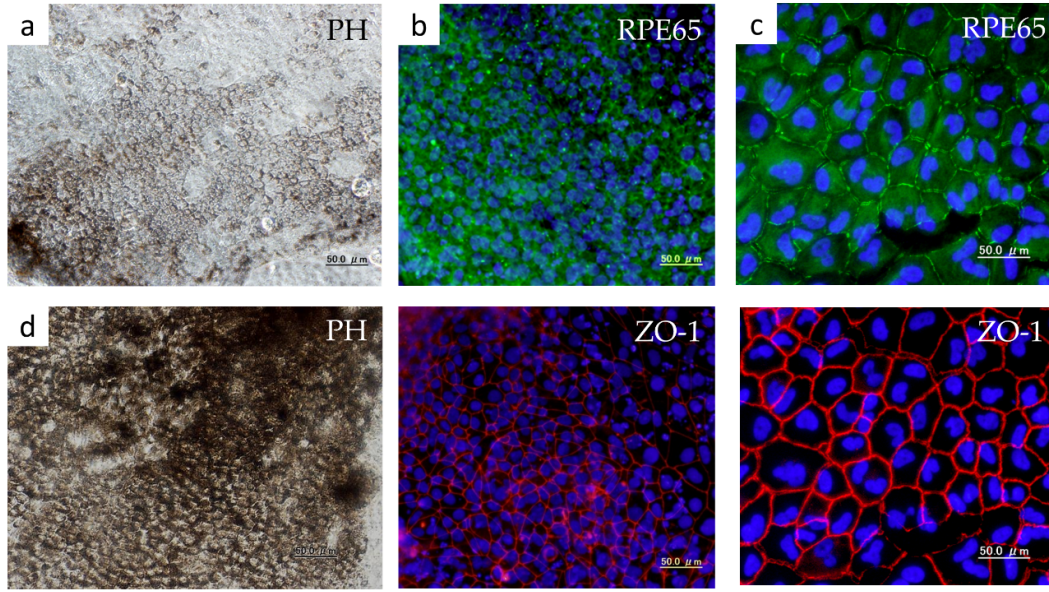

**Figure S2.** Pigmented cells were observed at 30 days and were positive for RPE65 (a marker of retinal pigment epithelial cells) and ZO-1 (a marker of intercellular connections).
